# Supplementary material for: Real-life implementation of a G6PD deficiency screening qualitative test into routine vivax malaria diagnostic units in the Brazilian Amazon (SAFEPRIM study)
Source: PubMed Central journal article supplement (PMC8162658; doi:10.1371/journal.pntd.0009415), 2021-05-18
Supplement: pntd.0009415.s004.pdf [file pntd.0009415.s004.pdf]

# RAPID TEST FOR SAFE USE OF PRIMAQUINE

## INSTRUCTIONS FOR USING THE RAPID TEST:

- 1) Test must be done at room temperature. Open the envelope and clean the patient's finger with alcohol pad.

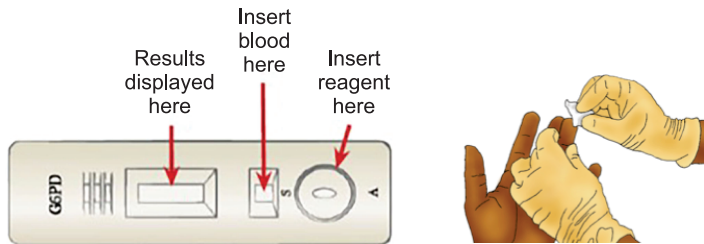

- 2) Prick the fingertip and collect blood with the single use pipette. Squeeze the bulb of pipette to transfer **blood** to the **blood** to the square hole marked with the **letter 'S'**.

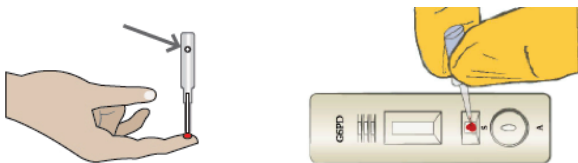

- 3) Add **2 drops of reagent** to the round hole marked with the **letter 'A'**. Wait for **at least 10 minutes** and **no more than 20 minutes** in order to read test results.

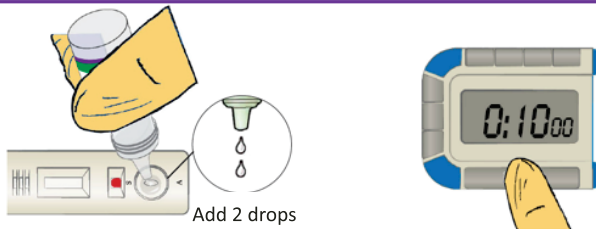

## RESULTS:

### PRIMAQUINE CAN BE USED DAILY:

A **purple color** indicates that the patient **CAN** use daily primaquine.

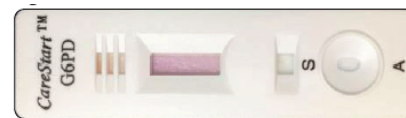

### PRIMAQUINE CANNOT BE USED DAILY:

If there is no color change, or if the result is a very faint purple color, the patient **CANNOT** use daily primaquine.

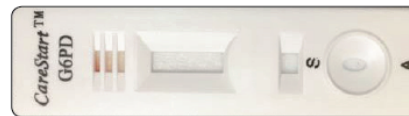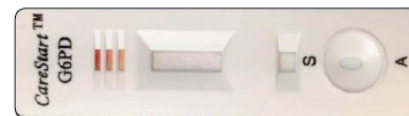

### INVALID TEST RESULT

Blood does not flow properly.

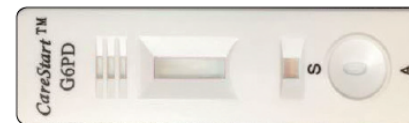

## DECISION TREE:

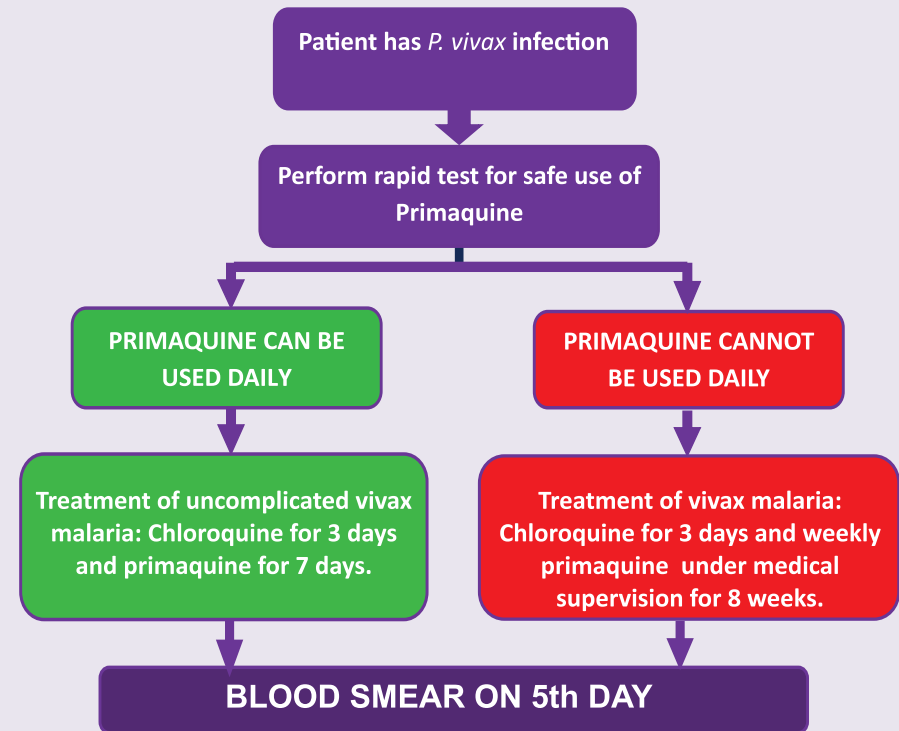

### WHAT TO REMEMBER DURING THE TEST:

- Caution when handling blood and disposing contaminated materials.
- Follow product instructions carefully.
- If the envelope is damaged in any way, the test material should be discarded.
- Do not reuse test devices.
