# Supplementary material for: Real-life implementation of a G6PD deficiency screening qualitative test into routine vivax malaria diagnostic units in the Brazilian Amazon (SAFEPRIM study)
Source: PubMed Central journal article supplement (PMC8162658; doi:10.1371/journal.pntd.0009415), 2021-05-18
Supplement: pntd.0009415.s005.pdf [file pntd.0009415.s005.pdf]

|                          |                                     |                                                                      |                                                                                       |                      |
|--------------------------|-------------------------------------|----------------------------------------------------------------------|---------------------------------------------------------------------------------------|----------------------|
| <b>NOTIFICATION DATA</b> | 2 Notification date:                | 3 Detection type:                                                    | 4 Symptoms:                                                                           | 5 Notifying State:   |
|                          | <input type="text"/>                | <input type="checkbox"/> 1-Passive <input type="checkbox"/> 2-Active | <input type="checkbox"/> 1-Symptoms present<br><input type="checkbox"/> 2-No symptoms | <input type="text"/> |
|                          | 6 Notifying Municipality:           | 7 Code of Notifying Municipality:                                    |                                                                                       |                      |
|                          | <input type="text"/>                | <input type="text"/>                                                 |                                                                                       |                      |
|                          | 8 Notifying Health Unit:            | 9 Code of Notifying Health Unit:                                     |                                                                                       |                      |
|                          | <input type="text"/>                | <input type="text"/>                                                 |                                                                                       |                      |
|                          | 10 Name of Notifying Health Worker: | 11 Code of Notifying Health Worker:                                  |                                                                                       |                      |
|                          | <input type="text"/>                | <input type="text"/>                                                 |                                                                                       |                      |

|                                                                                                                                                                               |                                                                                                                                                                                                |                                                                                                                                                                                                                                                                                                                                                                                                                                                                              |                                                                                                                                        |                                                                                                 |  |
|-------------------------------------------------------------------------------------------------------------------------------------------------------------------------------|------------------------------------------------------------------------------------------------------------------------------------------------------------------------------------------------|------------------------------------------------------------------------------------------------------------------------------------------------------------------------------------------------------------------------------------------------------------------------------------------------------------------------------------------------------------------------------------------------------------------------------------------------------------------------------|----------------------------------------------------------------------------------------------------------------------------------------|-------------------------------------------------------------------------------------------------|--|
| <b>PATIENT DATA</b>                                                                                                                                                           | 12 Patient's name:                                                                                                                                                                             | <input type="text"/>                                                                                                                                                                                                                                                                                                                                                                                                                                                         |                                                                                                                                        |                                                                                                 |  |
|                                                                                                                                                                               | 13 National Health Card Number:                                                                                                                                                                | 14 Date of Birth:                                                                                                                                                                                                                                                                                                                                                                                                                                                            | 15 Age:                                                                                                                                | <input type="checkbox"/> Age<br><input type="checkbox"/> Month<br><input type="checkbox"/> Year |  |
|                                                                                                                                                                               | <input type="text"/>                                                                                                                                                                           | <input type="text"/>                                                                                                                                                                                                                                                                                                                                                                                                                                                         | <input type="text"/>                                                                                                                   |                                                                                                 |  |
|                                                                                                                                                                               | 16 Gender:                                                                                                                                                                                     | 17 Is patient pregnant?                                                                                                                                                                                                                                                                                                                                                                                                                                                      | 1-1 <sup>st</sup> Trimester 2-2 <sup>nd</sup> Trimester 3-3 <sup>rd</sup> Trimester<br>4-Gestational age ignored 5-No 6-Does not apply |                                                                                                 |  |
|                                                                                                                                                                               | <input type="checkbox"/> Male <input type="checkbox"/> Female                                                                                                                                  | <input type="checkbox"/>                                                                                                                                                                                                                                                                                                                                                                                                                                                     |                                                                                                                                        |                                                                                                 |  |
|                                                                                                                                                                               | 18 Schooling:                                                                                                                                                                                  | 0 - Illiterate 1 - 1 <sup>st</sup> to 4 <sup>th</sup> grade Elementary School Education incomplete 2 - 2 <sup>nd</sup> to 4 <sup>th</sup> grade Elementary School Education complete 3 - 5 <sup>th</sup> to 8 <sup>th</sup> grade Elementary School Education incomplete<br>4 - Elementary School Education complete 5 - High School Education incomplete 6 - High School Education complete 7 - Unfinished university degree 8 - Full university degree 10 - Does not apply |                                                                                                                                        |                                                                                                 |  |
|                                                                                                                                                                               | <input type="checkbox"/>                                                                                                                                                                       |                                                                                                                                                                                                                                                                                                                                                                                                                                                                              |                                                                                                                                        |                                                                                                 |  |
| 19 Race/Color:                                                                                                                                                                | 20 Mother's name:                                                                                                                                                                              |                                                                                                                                                                                                                                                                                                                                                                                                                                                                              |                                                                                                                                        |                                                                                                 |  |
| <input type="checkbox"/> 1-White <input type="checkbox"/> 2-Black <input type="checkbox"/> 3-Yellow<br><input type="checkbox"/> 4-Brown <input type="checkbox"/> 5-Indigenous | <input type="text"/>                                                                                                                                                                           |                                                                                                                                                                                                                                                                                                                                                                                                                                                                              |                                                                                                                                        |                                                                                                 |  |
| 21 Principal activity in the last 15 days:                                                                                                                                    | 1 - Agriculture 2 - Livestock raising 3 - Domestic duties 4 - Tourism 5 - Mining 6 - Farming 7 - Hunting/Fishing<br>8 - Construction of dams/highways 9 - Quarrying 10 - Traveling 11 - Others |                                                                                                                                                                                                                                                                                                                                                                                                                                                                              |                                                                                                                                        |                                                                                                 |  |
| <input type="checkbox"/>                                                                                                                                                      |                                                                                                                                                                                                |                                                                                                                                                                                                                                                                                                                                                                                                                                                                              |                                                                                                                                        |                                                                                                 |  |
| 22 Patient's Address:                                                                                                                                                         | 23 Other country of residence:                                                                                                                                                                 |                                                                                                                                                                                                                                                                                                                                                                                                                                                                              |                                                                                                                                        |                                                                                                 |  |
| <input type="text"/>                                                                                                                                                          | <input type="text"/>                                                                                                                                                                           |                                                                                                                                                                                                                                                                                                                                                                                                                                                                              |                                                                                                                                        |                                                                                                 |  |
| 24 State of Residence:                                                                                                                                                        | 25 Municipality of Residence:                                                                                                                                                                  | 26 Municipality Code:                                                                                                                                                                                                                                                                                                                                                                                                                                                        |                                                                                                                                        |                                                                                                 |  |
| <input type="text"/>                                                                                                                                                          | <input type="text"/>                                                                                                                                                                           | <input type="text"/>                                                                                                                                                                                                                                                                                                                                                                                                                                                         |                                                                                                                                        |                                                                                                 |  |
| 27 Location of Residence                                                                                                                                                      | 28 Code of Location of Residence:                                                                                                                                                              |                                                                                                                                                                                                                                                                                                                                                                                                                                                                              |                                                                                                                                        |                                                                                                 |  |
| <input type="text"/>                                                                                                                                                          | <input type="text"/>                                                                                                                                                                           |                                                                                                                                                                                                                                                                                                                                                                                                                                                                              |                                                                                                                                        |                                                                                                 |  |
| 29 Date First Symptoms Occurred:                                                                                                                                              | 30 Has the patient received treatment for vivax malaria in the last 60 days?                                                                                                                   | 31 Has the patient received treatment for falciparum malaria in the last 40 days?                                                                                                                                                                                                                                                                                                                                                                                            |                                                                                                                                        |                                                                                                 |  |
| <input type="text"/>                                                                                                                                                          | <input type="checkbox"/> 1-Yes <input type="checkbox"/> 2-No                                                                                                                                   | <input type="checkbox"/> 1-Yes <input type="checkbox"/> 2-No                                                                                                                                                                                                                                                                                                                                                                                                                 |                                                                                                                                        |                                                                                                 |  |

|                                               |                                                       |                                                           |  |  |
|-----------------------------------------------|-------------------------------------------------------|-----------------------------------------------------------|--|--|
| <b>PROBABLE PLACE OF INFECTION</b>            | 32 Other country where infection could have occurred: | 33 State where infection could have occurred:             |  |  |
|                                               | <input type="text"/>                                  | <input type="text"/>                                      |  |  |
|                                               | 34 Municipality where infection could have occurred:  | 35 Municipality code where infection could have occurred: |  |  |
| <input type="text"/>                          | <input type="text"/>                                  |                                                           |  |  |
| 36 Place where infection could have occurred: | 37 Place code where infection could have occurred:    |                                                           |  |  |
| <input type="text"/>                          | <input type="text"/>                                  |                                                           |  |  |

|                                                                                                                                                                                                      |                                                                                                   |                                                                                |                                                                                            |                                    |
|------------------------------------------------------------------------------------------------------------------------------------------------------------------------------------------------------|---------------------------------------------------------------------------------------------------|--------------------------------------------------------------------------------|--------------------------------------------------------------------------------------------|------------------------------------|
| <b>TEST DATA</b>                                                                                                                                                                                     | 38 Date of Test:                                                                                  | 39 Type of Test:                                                               | 40 Test Results:                                                                           | 41 Parasites per mm <sup>3</sup> : |
|                                                                                                                                                                                                      | <input type="text"/>                                                                              | <input type="checkbox"/> 1-Thick blood smear<br><input type="checkbox"/> 2-RDT | 1- Negative; 2- F; 3- F+FG; 4- V; 5- F+V;<br>6- V+FG; 7- FG; 8- M; 9- F+M; 10- Ov; 11-No F | <input type="text"/>               |
|                                                                                                                                                                                                      | 42 Parasitemia counted as "crosses":                                                              | 43 Other Hemoparasites Researched:                                             |                                                                                            | <input type="checkbox"/>           |
| <input type="checkbox"/> 1- < +/2 (less than half a cross); 2- +/2 (half a cross); 3- + (one cross);<br><input type="checkbox"/> 4- ++ (two crosses); 5- +++ (three crosses); 6- ++++ (four crosses) | 1-Negative 2-Trypanosoma sp. 3-Microfilament<br>4-Trypanosoma sp. + Microfilaria 9-Not Researched |                                                                                |                                                                                            |                                    |
| 44 Tester's name:                                                                                                                                                                                    | 45 Tester's code:                                                                                 |                                                                                |                                                                                            |                                    |
| <input type="text"/>                                                                                                                                                                                 | <input type="text"/>                                                                              |                                                                                |                                                                                            |                                    |

|                  |                                                                                                                                                                                                                                                                                                                                                                                                                                                                                                                                                                                                                                                                                                                                                                                                                                                                                                                                                                                                                                                                                                                                                                                                                                                                                                                                                                                                                                                                                                                                                                                                                                                                           |                          |
|------------------|---------------------------------------------------------------------------------------------------------------------------------------------------------------------------------------------------------------------------------------------------------------------------------------------------------------------------------------------------------------------------------------------------------------------------------------------------------------------------------------------------------------------------------------------------------------------------------------------------------------------------------------------------------------------------------------------------------------------------------------------------------------------------------------------------------------------------------------------------------------------------------------------------------------------------------------------------------------------------------------------------------------------------------------------------------------------------------------------------------------------------------------------------------------------------------------------------------------------------------------------------------------------------------------------------------------------------------------------------------------------------------------------------------------------------------------------------------------------------------------------------------------------------------------------------------------------------------------------------------------------------------------------------------------------------|--------------------------|
| <b>TREATMENT</b> | 46 Course of treatment used according to the Malaria Therapy Manual:                                                                                                                                                                                                                                                                                                                                                                                                                                                                                                                                                                                                                                                                                                                                                                                                                                                                                                                                                                                                                                                                                                                                                                                                                                                                                                                                                                                                                                                                                                                                                                                                      | 47 Treatment Start Date: |
|                  | 1 - P. vivax or P. ovale infections with chloroquine for 3 days and primaquine for 7 days (short course);<br>2 - P. vivax, or P. ovale infections with chloroquine for 3 days and primaquine for 14 days (long course);<br>3 - P. malariae infections for all ages and P. vivax or P. ovale infections in pregnant women and children under 6 months of age with chloroquine for 3 days;<br>4 - Prevention of frequent relapses by P. vivax or P. ovale with weekly chloroquine for 12 weeks;<br>5 - P. falciparum infections with the fixed combination of artemether + lumefantrine for 3 days;<br>6 - P. falciparum infections with fixed combination of artesunate + mefloquine for 3 days;<br>7 - P. falciparum infections with quinine for 3 days, doxycycline for 5 days and primaquine for 6 days;<br>8 - Mixed infections by P. falciparum and P. vivax or P. ovale with Artemether + Lumefantrina or Artesunate + Mefloquine for 3 days and Primaquine for 7 days;<br>9 - Uncomplicated P. falciparum infections in the first trimester of pregnancy and in children under 6 months with quinine for 3 days and clindamycin for 5 days;<br>10 - Severe and complicated P. falciparum malaria in all age groups;<br>11 - P. falciparum infections with the fixed combination of artemether + lumefantrine for 3 days and single dose primaquine;<br>12 - P. falciparum infections with the fixed combination of artesunate + mefloquine for 3 days and single dose primaquine;<br>13 - P. vivax or P. ovale infections with chloroquine for 3 days and weekly primaquine for 8 weeks under medical supervision<br>99 - Other course used (by doctor) - describe: | <input type="text"/>     |

|                                                                  |                                                                                                           |                                                                                                                                                      |                                        |
|------------------------------------------------------------------|-----------------------------------------------------------------------------------------------------------|------------------------------------------------------------------------------------------------------------------------------------------------------|----------------------------------------|
| <b>RAPID TEST FOR USE OF PRIMAQUINE</b>                          | 48 Rapid test result for use of Primaquine:                                                               | <input type="checkbox"/> 1-CAN use primaquine daily a <input type="checkbox"/> 2-CANNOT use primaquine daily <input type="checkbox"/> 3-No test done |                                        |
|                                                                  | 49 Source of information:                                                                                 | 50 Has the patient received a blood transfusion in the last 60 days?                                                                                 |                                        |
|                                                                  | <input type="checkbox"/> 1-RDT <input type="checkbox"/> 2-Malaria Info Card                               | <input type="checkbox"/> 1-Yes <input type="checkbox"/> 2-No                                                                                         |                                        |
|                                                                  | Fill in spaces 51 and 52 only on patient's return on day 5 of treatment                                   |                                                                                                                                                      | 51 Date of last positive malaria test: |
| <input type="text"/>                                             |                                                                                                           | <input type="text"/>                                                                                                                                 |                                        |
| 52 Has the patient reported/presented dark urine or yellow eyes? | <input type="checkbox"/> 1-Yes <input type="checkbox"/> 2-No <input type="checkbox"/> 3-Other - describe: |                                                                                                                                                      |                                        |
| <input type="checkbox"/>                                         |                                                                                                           |                                                                                                                                                      |                                        |
| 53 Patient's weight (Kg):                                        | 54 Patient's telephone number:                                                                            |                                                                                                                                                      |                                        |
| <input type="text"/>                                             | <input type="text"/>                                                                                      |                                                                                                                                                      |                                        |

|                                                           |                                                                                                                                                      |                      |
|-----------------------------------------------------------|------------------------------------------------------------------------------------------------------------------------------------------------------|----------------------|
| <b>DISTRICT HEALTH DEPARTMENT STATE CODE MUNICIPALITY</b> | 12 Patient's name:                                                                                                                                   | 15 Age:              |
|                                                           | <input type="text"/>                                                                                                                                 | <input type="text"/> |
|                                                           | 1 Notification No:                                                                                                                                   | 38 Test Date:        |
| <input type="text"/>                                      | <input type="text"/>                                                                                                                                 | <input type="text"/> |
| 48 Rapid test result for the use of Primaquine            | <input type="checkbox"/> 1-CAN use primaquine daily a <input type="checkbox"/> 2-CANNOT use primaquine daily <input type="checkbox"/> 3-No test done |                      |
| <input type="checkbox"/>                                  |                                                                                                                                                      |                      |

Proof of exam result to be given to the patient  
**PATIENT, PLEASE NOTE: If you have dark urine (coca cola color) or yellow eyes, seek for medial assistance.**
