# Supplementary material for: Real-life implementation of a G6PD deficiency screening qualitative test into routine vivax malaria diagnostic units in the Brazilian Amazon (SAFEPRIM study)
Source: PubMed Central journal article supplement (PMC8162658; doi:10.1371/journal.pntd.0009415), 2021-05-18
Supplement: pntd.0009415.s006.pdf [file pntd.0009415.s006.pdf]

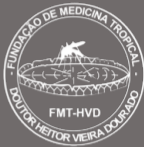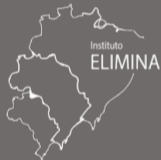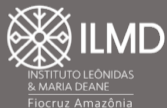

Fundação de Medicina Tropical Dr. Heitor Vieira Dourado

## Malaria Info Card

Name: \_\_\_\_\_

Weight (Kg): \_\_\_\_\_

Date of Birth: \_\_\_\_/\_\_\_\_/\_\_\_\_

Address: \_\_\_\_\_

\_\_\_\_\_

Mother's name: \_\_\_\_\_

Phone number: \_\_\_\_\_

## RESULTS OF THE RAPID TEST FOR SAFE USE OF PRIMAQUINE:

This patient has had the G6PD test and **CANNOT** use daily primaquine.

Test date: \_\_\_\_\_/\_\_\_\_\_/\_\_\_\_\_

Name of clinic: \_\_\_\_\_

HCP: \_\_\_\_\_

| Date of malaria test | Result                                                                                                             | Treatment | Return date<br>(Return on day 5 of treatment) | Signs and symptoms                                                                                                                       |
|----------------------|--------------------------------------------------------------------------------------------------------------------|-----------|-----------------------------------------------|------------------------------------------------------------------------------------------------------------------------------------------|
| ____/____/____       | <input type="checkbox"/> VIVAX<br><input type="checkbox"/> FALCIPARUM<br><input type="checkbox"/> MIXED INFECTION. |           | ____/____/____                                | <input type="checkbox"/> Dark urine<br><input type="checkbox"/> Yellow eyes and or skin<br><input type="checkbox"/> Others, please list: |
| ____/____/____       | <input type="checkbox"/> VIVAX<br><input type="checkbox"/> FALCIPARUM<br><input type="checkbox"/> MIXED INFECTION. |           | ____/____/____                                | <input type="checkbox"/> Dark urine<br><input type="checkbox"/> Yellow eyes and or skin<br><input type="checkbox"/> Others, please list: |
| ____/____/____       | <input type="checkbox"/> VIVAX<br><input type="checkbox"/> FALCIPARUM<br><input type="checkbox"/> MIXED INFECTION. |           | ____/____/____                                | <input type="checkbox"/> Dark urine<br><input type="checkbox"/> Yellow eyes and or skin<br><input type="checkbox"/> Others, please list: |
| ____/____/____       | <input type="checkbox"/> VIVAX<br><input type="checkbox"/> FALCIPARUM<br><input type="checkbox"/> MIXED INFECTION. |           | ____/____/____                                | <input type="checkbox"/> Dark urine<br><input type="checkbox"/> Yellow eyes and or skin<br><input type="checkbox"/> Others, please list: |

- If your **urine becomes dark, similar to Coca Cola, your eyes or skin become yellow**, seek medical attention.
  - **Do not stop taking your medicine**, even if you are feeling better.
- Always **show this card to the nurse or your doctor**, if you are suspected of having malaria.

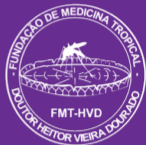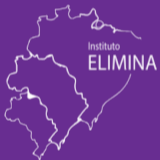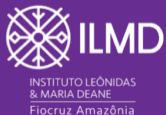

Fundação de Medicina Tropical Dr. Heitor Vieira Dourado

## Malaria Info Card

Name: \_\_\_\_\_

Weight (Kg): \_\_\_\_\_

Date of Birth: \_\_\_\_/\_\_\_\_/\_\_\_\_

Address: \_\_\_\_\_

\_\_\_\_\_

Mother's name: \_\_\_\_\_

Phone number: \_\_\_\_\_

## RESULTS OF THE RAPID TEST FOR SAFE USE OF PRIMAQUINE

This patient has had the G6PD test and **CAN** use daily primaquine.

Test date: \_\_\_\_\_/\_\_\_\_\_/\_\_\_\_\_

Name of clinic: \_\_\_\_\_

HCP: \_\_\_\_\_

| Date of malaria test | Result                                                                                                             | Treatment | Return date<br><small>(Return on day 5 of treatment)</small> | Signs and symptoms                                                                                                                       |
|----------------------|--------------------------------------------------------------------------------------------------------------------|-----------|--------------------------------------------------------------|------------------------------------------------------------------------------------------------------------------------------------------|
| ____/____/____       | <input type="checkbox"/> VIVAX<br><input type="checkbox"/> FALCIPARUM<br><input type="checkbox"/> MIXED INFECTION. |           | ____/____/____                                               | <input type="checkbox"/> Dark urine<br><input type="checkbox"/> Yellow eyes and or skin<br><input type="checkbox"/> Others, please list: |
| ____/____/____       | <input type="checkbox"/> VIVAX<br><input type="checkbox"/> FALCIPARUM<br><input type="checkbox"/> MIXED INFECTION. |           | ____/____/____                                               | <input type="checkbox"/> Dark urine<br><input type="checkbox"/> Yellow eyes and or skin<br><input type="checkbox"/> Others, please list: |
| ____/____/____       | <input type="checkbox"/> VIVAX<br><input type="checkbox"/> FALCIPARUM<br><input type="checkbox"/> MIXED INFECTION. |           | ____/____/____                                               | <input type="checkbox"/> Dark urine<br><input type="checkbox"/> Yellow eyes and or skin<br><input type="checkbox"/> Others, please list: |
| ____/____/____       | <input type="checkbox"/> VIVAX<br><input type="checkbox"/> FALCIPARUM<br><input type="checkbox"/> MIXED INFECTION. |           | ____/____/____                                               | <input type="checkbox"/> Dark urine<br><input type="checkbox"/> Yellow eyes and or skin<br><input type="checkbox"/> Others, please list: |

- If your **urine becomes dark, similar to Coca Cola, your eyes or skin become yellow**, seek medical attention.
  - **Do not stop taking your medicine**, even if you are feeling better.
- Always **show this card to the nurse or your doctor**, if you are suspected of having malaria.
